# Supplementary material for: Numerical Investigation on the Influence of Class Number and Wavelength on the Performance of Curved Vane Demisters
Source: MDPI journal article supplement (doi:10.3390/atmos13101711), 2022-10-18
Supplement: s1 [file s1]

# Supplementary Materials: Numerical Investigation on the Influence of Class Number and Wavelength on the Performance of Curved Vane Demisters

Zhen Cai <sup>1,†</sup>, Pengfei Wang <sup>2,3,†</sup>, Xiangyu Luo <sup>2,3</sup>, Jin Huang <sup>2,3</sup>, Zhenqi Qin <sup>2,3</sup>, Jinna Mei <sup>1,\*</sup> and Wensheng Zhao <sup>2,3,\*</sup>

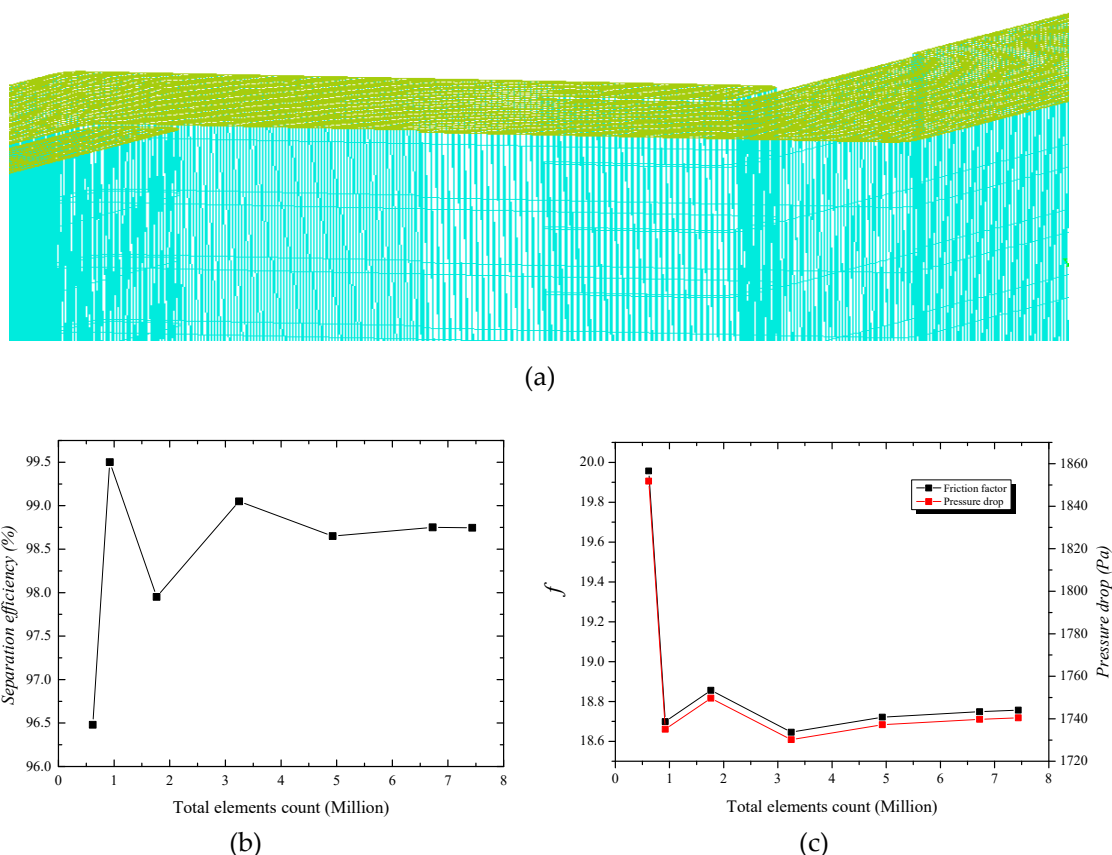

**Figure S1.** Mesh discretization of the fluid domain (a) mesh model, independence check of (b) separation efficiency, and temperature loss; (c) friction factor and pressure drop under inlet velocity  $U_g = 10.00$  m/s.
